# Supplementary material for: The breakdown of reticent biomass to soluble components and their conversion to levulinic acid as a fuel precursor
Source: Royal Society of Chemistry journal article supplement (doi:10.1039/c3ra47923d), 2014-01-01
Supplement: c3ra47923d1.pdf [file c3ra47923d1.pdf]

Supporting information for

## The breakdown of reticent biomass to soluble components and their conversion to levulinic acid as a fuel precursor

Jiang Li, Dao-jun Ding, Lu-jiang Xu, Yao Fu\*, Qing-xiang Guo

Supporting Figures

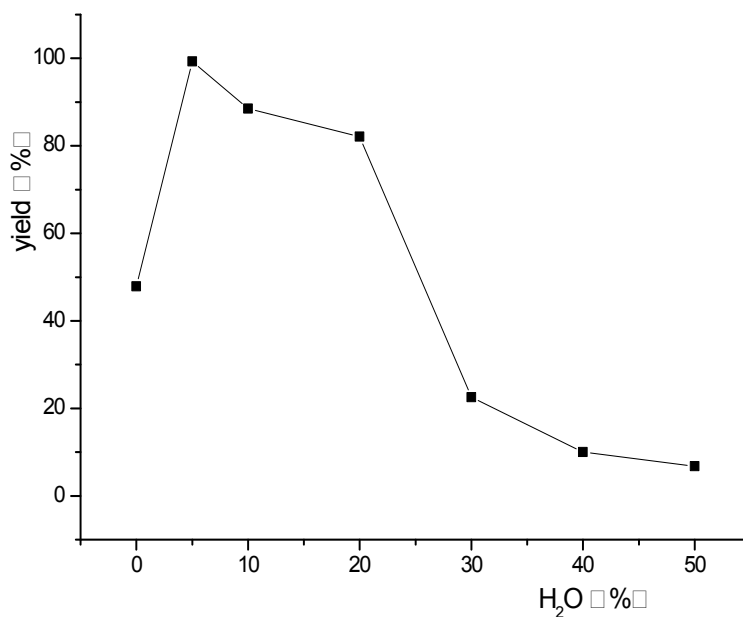

**Figure S1.** Effect of water content in the solvent on the yield of furfuryl alcohol from furfural and formic acid. Reaction condition: Furfural (2 mmol), FA (8 mmol), Ru/C (0.4 g), additive (NaOH) was 10 mol% to the formic acid.

A:

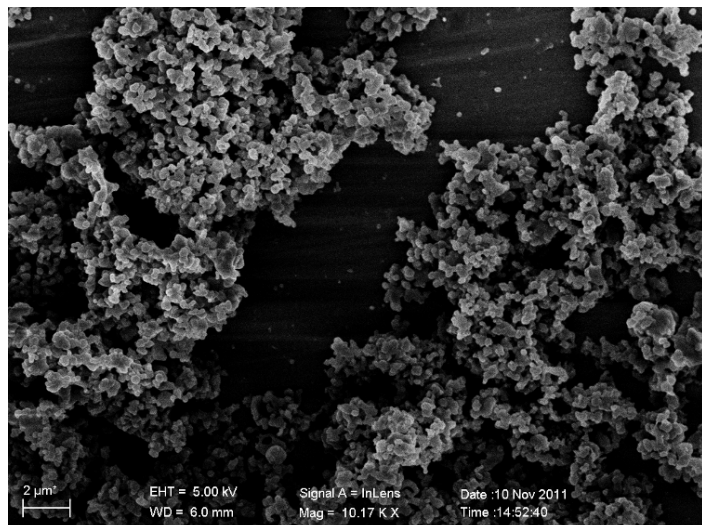

B:

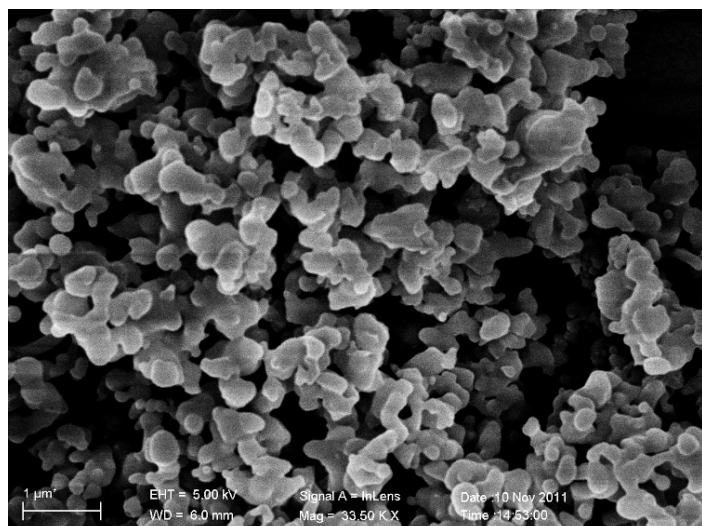

C:

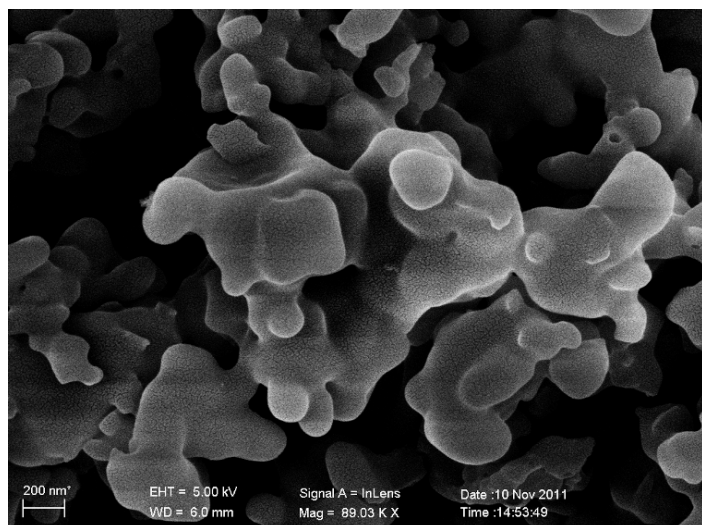

**Figure S2.** Low magnification SEM image of the solid residue. The lignin droplets could be

clearly observed.
